# Supplementary material for: Impact of galactosylceramides on the nanomechanical properties of lipid bilayer models: an AFM-force spectroscopy study
Source: Royal Society of Chemistry journal article supplement (doi:10.1039/c5sm01252j), 2015-01-01
Supplement: c5sm01252j1.pdf [file c5sm01252j1.pdf]

**Electronic Supplementary Information**

**Impact of Galactosylceramide on the nanomechanical properties lipid of bilayer models: AFM-force spectroscopy study**

*Berta Gumí-Audenis, Fausto Sanz and Marina I. Giannotti\**

Institute for Bioengineering of Catalonia (IBEC). Baldiri Reixac 15-21, Barcelona, 08028, Spain

Physical Chemistry Department, Universitat de Barcelona, Barcelona, 08028, Spain

Networking Biomedical Research Center on Bioengineering, Biomaterials and Nanomedicine (CIBER-BBN), Madrid, 28029, Spain

\* Corresponding author: [migiannotti@ub.edu](mailto:migiannotti@ub.edu)

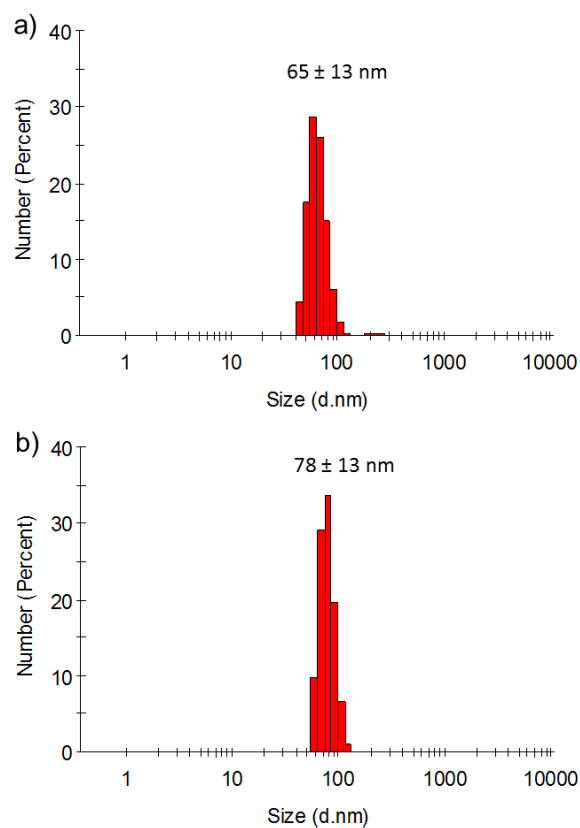

**Figure S1.** Number-weighted diameter distribution measured by DLS (Setasizer NanoS, Malvern Instruments) of: a) DLPC:GalCer (80:20 molar ratio) and b) DPPC:GalCer (80:20 molar ratio) vesicle suspensions, in 150 mM NaCl, 20 mM MgCl<sub>2</sub>, 20 mM Hepes (pH 7.4), obtained as described in the *Experimental section (Sample preparation. Liposome suspensions)*.

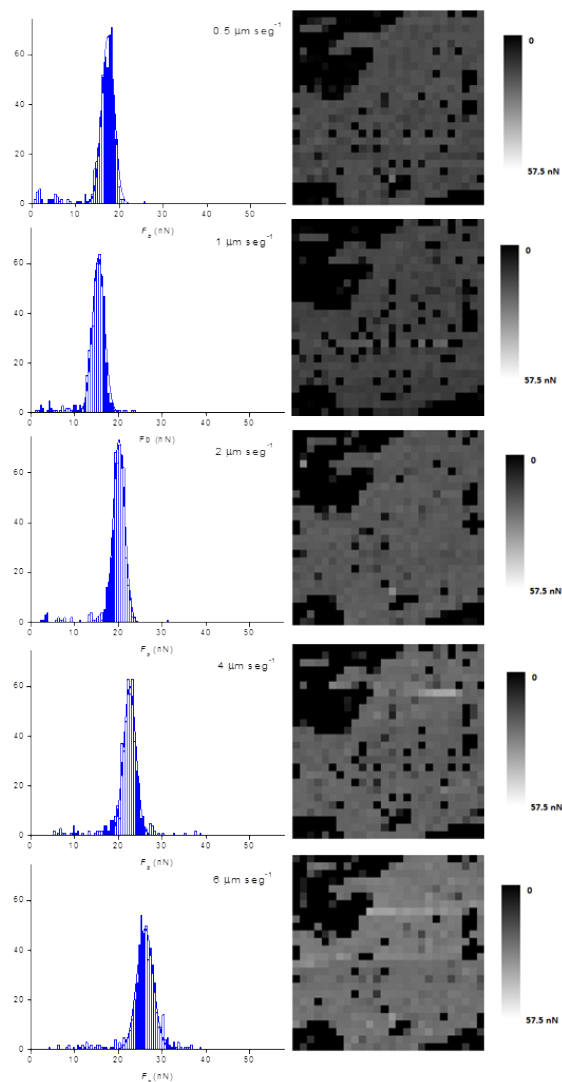

**Figure S2.**  $F_b$  distribution and map for AFM indentation on DPPC SLB (deposited on mica, in 150 mM NaCl, 20 mM MgCl<sub>2</sub>, 20 mM Hepes (pH 7.4)), obtained at different approaching velocities: 0.5, 1, 2, 4 and 6  $\mu\text{m seg}^{-1}$ .

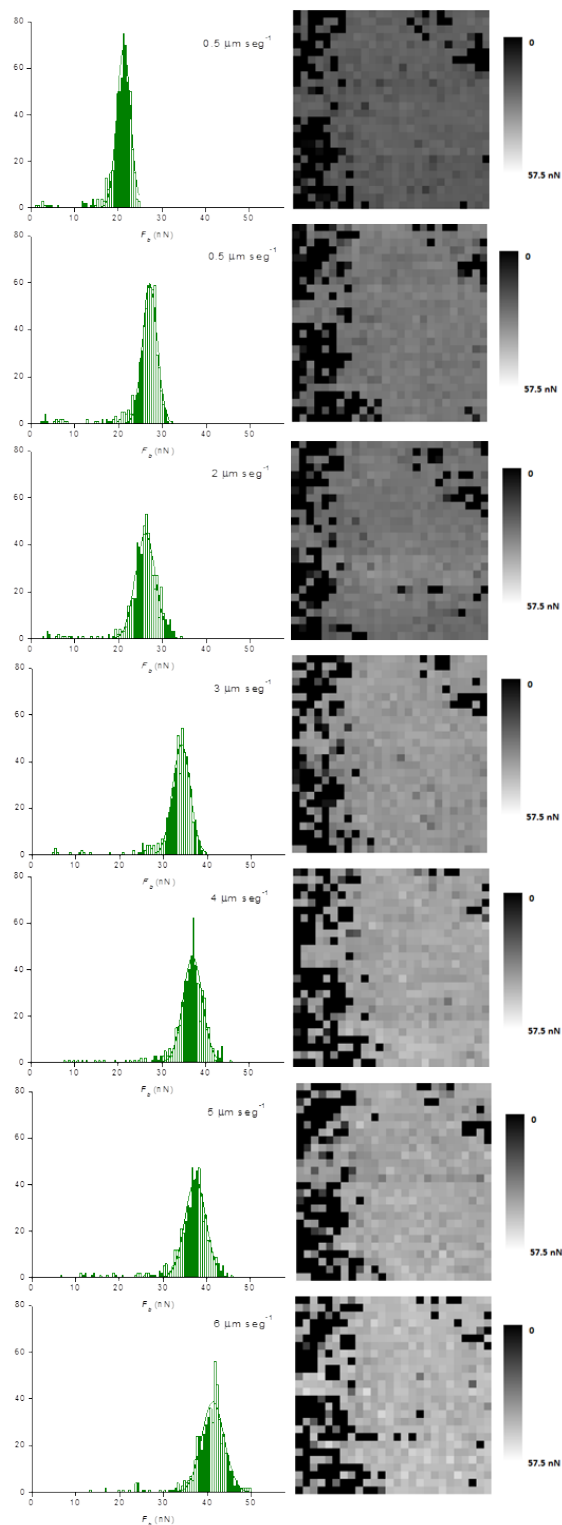

**Figure S3.**  $F_b$  distribution and map for AFM indentation on DPPC:GalCer (80:20) SLB (deposited on mica, in 150 mM NaCl, 20 mM MgCl<sub>2</sub>, 20 mM Hepes (pH 7.4)), obtained at different approaching velocities: 0.5, 1, 2, 4 and 6  $\mu\text{m s}^{-1}$ .
